# Supplementary material
Source: publisher site journal article supplement (https://www.dovepress.com/article/340066)
Supplement: Supplementary file 1 [file get_supplementary_file.php]

**Appendix A:** Normal range of hormone levels

| Hormones | Reference range | Unit |
| --- | --- | --- |
| Follicle-stimulating Hormone (FSH) | Follicular phase 3.5-12.5  Ovulatory phase 4.7-21.5  Luteal phase 1.7-7.7  amennorhea 5.8-134.8 | mIU/mL |
| Luteinizing Hormone (LH) | Follicular phase 2.4-12.6  Ovulatory phase 14.0-95.6  Luteal phase 1.0-11.4  amennorhea 7.7-58.5 | mIU/mL |
| Estradiol (E2) | Follicular phase 12.4-233  Ovulatory phase 41-398  Luteal phase 22.3-341  amennorhea 5.0-138 | pmol/mL |
